# Supplementary material
Source: PubMed Central journal article supplement (PMC4502754)
Supplement: chest_147_2_295_ds01.pdf [file chest_147_2_295_ds01.pdf]

## Components Necessary for High-Quality Lung Cancer Screening

American College of Chest Physicians and American Thoracic Society Policy Statement

*Peter Mazzone, MD, MPH, FCCP; Charles A. Powell, MD; Douglas Arenberg, MD, FCCP; Peter Bach, MD; Frank Detterbeck, MD, FCCP; Michael K. Gould, MD, FCCP; Michael T. Jaklitsch, MD; James Jett, MD, FCCP; David Naidich, MD, FCCP; Anil Vachani, MD; Renda Soylemez Wiener, MD; and Gerard Silvestri, MD, FCCP*

CHEST 2015; 147(2):295-303

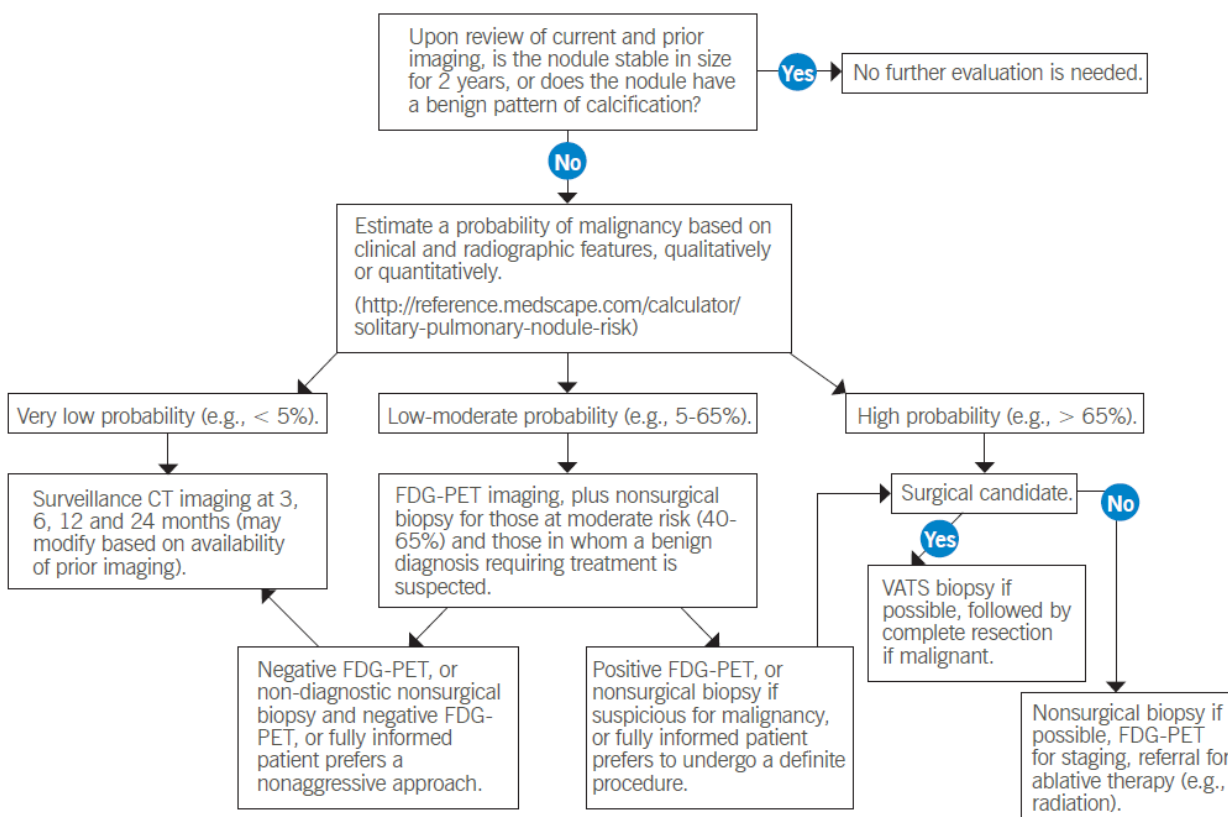

**e-Figure 1:** Example of management algorithm for solid nodules 1 cm or greater in diameter.

*Online supplements are not copyedited prior to posting.*

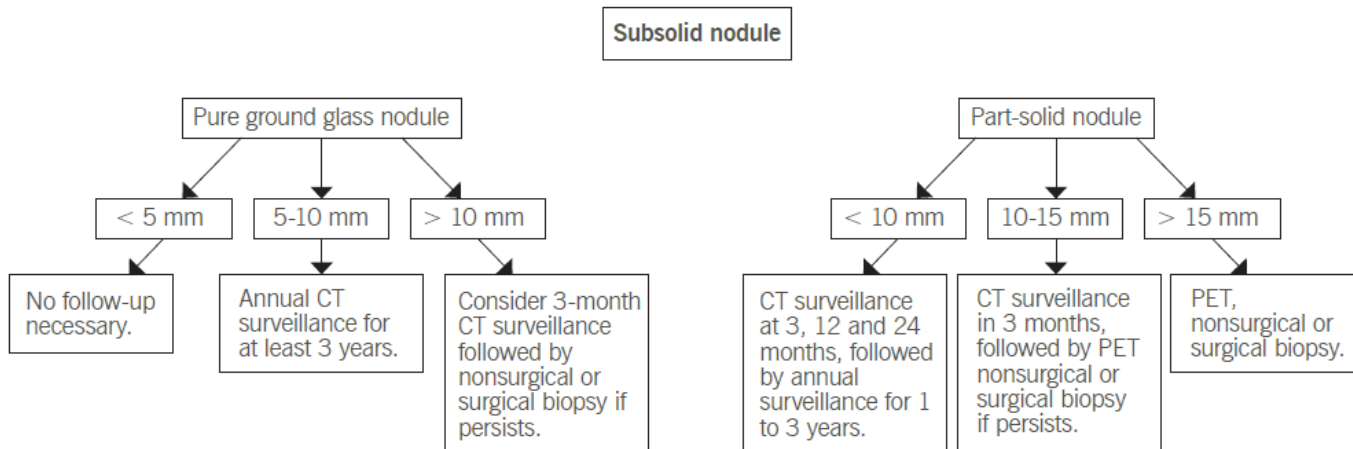

**e-Figure 2:** Example of management algorithm for subsolid nodules (20).

| ADULT LUNG CANCER SCREENING TECHNICAL SPECIFICATIONS                                                                                         |                                                                         |                                                                                                                                                                                                                    |
|----------------------------------------------------------------------------------------------------------------------------------------------|-------------------------------------------------------------------------|--------------------------------------------------------------------------------------------------------------------------------------------------------------------------------------------------------------------|
| Adult Chest for Lung Cancer Screening                                                                                                        |                                                                         |                                                                                                                                                                                                                    |
| Technique Parameters (Items in bold are designation requirements. Failure to meet these requirements will result in deferral of Designation) |                                                                         |                                                                                                                                                                                                                    |
| Scan Parameter                                                                                                                               | Parameter Specification                                                 | Comments                                                                                                                                                                                                           |
| Scanner type                                                                                                                                 | <b>multidetector helical (spiral) detector rows <math>\geq 4</math></b> | non helical and single detector scanners are not appropriate for lung cancer screening CT                                                                                                                          |
| Required Series                                                                                                                              |                                                                         | No IV or oral contrast should be used                                                                                                                                                                              |
| kV                                                                                                                                           | 100 to 140 acceptable for standard sized patient                        | Should be set in combination with mAs to meet CTDIvol specifications                                                                                                                                               |
| mAs                                                                                                                                          | Should be set in combination with kVp to meet CTDIvol specifications.   | The mAs selected should result in diagnostic-quality images of the lungs. Should take into account the patient's body habitus and age, slice width, kVp, and unique attributes of the scanner and acquisition mode |
| Max. Tube Rotation Time                                                                                                                      | $\leq 0.5$ seconds                                                      | 0.75 second is acceptable if a single breath hold $\leq 15$ seconds can be achieved for scanners that cannot perform 0.5 second rotation time                                                                      |
| Pitch (IEC Definition)                                                                                                                       | Between 0.7 and 1.5                                                     | Should be set with other technical parameters to achieve single breath hold scan and CTDIvol specifications                                                                                                        |
| Respiration                                                                                                                                  | <b>single breath hold full inspiration</b>                              |                                                                                                                                                                                                                    |
| Scan duration/ Acquisition time                                                                                                              | $\leq 15$ seconds                                                       | Time to acquire the scan though entire lungs within a single breath                                                                                                                                                |
| Reconstructed image width (nominal width of reconstructed image along z-axis)                                                                | $\leq 2.5$ mm                                                           | $\leq 1$ mm preferred                                                                                                                                                                                              |
| Reconstructed image spacing (Distance between two reconstructed images)                                                                      | $\leq$ slice width                                                      | Overlapping reconstructions are not necessary but are acceptable                                                                                                                                                   |

**e-Table 1:** ACR-STR lung cancer screening LDCT recommendations (13).

*Online supplements are not copyedited prior to posting.*

| Category                      | Category Descriptor                                                                                                                        | Category | Findings                                                                                                                                                                                                                                                    | Management                                                                                                                                                                                 | Probability of Malignancy | Estimated Population Prevalence |
|-------------------------------|--------------------------------------------------------------------------------------------------------------------------------------------|----------|-------------------------------------------------------------------------------------------------------------------------------------------------------------------------------------------------------------------------------------------------------------|--------------------------------------------------------------------------------------------------------------------------------------------------------------------------------------------|---------------------------|---------------------------------|
| Incomplete                    | -                                                                                                                                          | 0        | prior chest CT examination(s) being located for comparison<br>part or all of lungs cannot be evaluated                                                                                                                                                      | Additional lung cancer screening CT images and/or comparison to prior chest CT examinations is needed                                                                                      | n/a                       | 1%                              |
| Negative                      | No nodules and definitely benign nodules                                                                                                   | 1        | no lung nodules<br>nodule(s) with specific calcifications: complete, central, popcorn, concentric rings and fat containing nodules                                                                                                                          | Continue annual screening with LDCT in 12 months                                                                                                                                           | < 1%                      | 90%                             |
| Benign Appearance or Behavior | Nodules with a very low likelihood of becoming a clinically active cancer due to size or lack of growth                                    | 2        | solid nodule(s):<br>< 6 mm<br>new < 4 mm<br>part solid nodule(s):<br>< 6 mm total diameter on baseline screening<br>non solid nodule(s) (GGN):<br>< 20 mm OR<br>≥ 20 mm and unchanged or slowly growing<br>category 3 or 4 nodules unchanged for ≥ 3 months |                                                                                                                                                                                            |                           |                                 |
| Probably Benign               | Probably benign finding(s) - short term follow up suggested; includes nodules with a low likelihood of becoming a clinically active cancer | 3        | solid nodule(s):<br>≥ 6 to < 8 mm at baseline OR<br>new 4 mm to < 6 mm<br>part solid nodule(s)<br>≥ 6 mm total diameter with solid component < 6 mm OR<br>new < 6 mm total diameter<br>non solid nodule(s) (GGN) ≥ 20 mm on baseline CT or new              | 6 month LDCT                                                                                                                                                                               | 1-2%                      | 5%                              |
| Suspicious                    | Findings for which additional diagnostic testing and/or tissue sampling is recommended                                                     | 4A       | solid nodule(s):<br>≥ 8 to < 15 mm at baseline OR<br>growing < 8 mm OR<br>new 6 to < 8 mm<br>part solid nodule(s):<br>≥ 6 mm with solid component ≥ 6 mm to < 8 mm OR<br>with a new or growing < 4 mm solid component<br>endobronchial nodule               | 3 month LDCT; PET/CT may be used when there is a ≥ 8 mm solid component                                                                                                                    | 5-15%                     | 2%                              |
|                               |                                                                                                                                            | 4B       | solid nodule(s)<br>≥ 15 mm OR<br>new or growing, and ≥ 8 mm<br>part solid nodule(s) with:<br>a solid component ≥ 8 mm OR<br>a new or growing ≥ 4 mm solid component                                                                                         | chest CT with or without contrast, PET/CT and/or tissue sampling depending on the "probability of malignancy and comorbidities. PET/CT may be used when there is a ≥ 8 mm solid component. | > 15%                     | 2%                              |
|                               |                                                                                                                                            | 4X       | Category 3 or 4 nodules with additional features or imaging findings that increases the suspicion of malignancy                                                                                                                                             |                                                                                                                                                                                            |                           |                                 |
| Other                         | Clinically Significant or Potentially Clinically Significant Findings (non lung cancer)                                                    | 5        | modifier - may add on to category 0-4 coding                                                                                                                                                                                                                | As appropriate to the specific finding                                                                                                                                                     | n/a                       | 10%                             |
| Prior Lung Cancer             | Modifier for patients with a prior diagnosis of lung cancer who return to screening                                                        | C        | modifier - may add on to category 0-4 coding                                                                                                                                                                                                                | -                                                                                                                                                                                          | -                         | -                               |

**e-Table 2:** LungRADS (19)

**e-Table 3:** Smoking cessation resources

- <http://tobaccodependence.chestnet.org/>
- <http://www.uspreventiveservicestaskforce.org/uspstf09/tobacco/tobaccors2.htm>
- <http://www.surgeongeneral.gov/initiatives/tobacco/resources.html>
- <http://www.cdc.gov/tobacco/campaign/tips/quit-smoking/guide/>
- <http://annals.org/article.aspx?articleid=744446>

**e-Table 4:** Education material resources

- <http://www.lung.org/lung-disease/lung-cancer/lung-cancer-screening-guidelines/lung-cancer-one-pager.pdf>
- <http://jama.jamanetwork.com/article.aspx?articleid=1685860>
- <http://www.uspreventiveservicestaskforce.org/uspstf13/lungcan/lungcanguide.pdf>
- <http://www.uspreventiveservicestaskforce.org/uspstf13/lungcan/lungcanfact.pdf>
- <http://www.cancer.gov/newscenter/qa/2002/NLSTstudyGuidePatientsPhysicians>

*Online supplements are not copyedited prior to posting.*
